# Supplementary material for: Macroautophagy is deregulated in murine and human lupus T lymphocytes
Source: PubMed Central journal article supplement — Autophagy. 2012 Jul 1;8(7):1113–23. doi: 10.4161/auto.20275 (PMC3429547; doi:10.4161/auto.20275), 2012-07-01
Supplement: auto-8-1113-s01.pdf [file auto-8-1113-s01.pdf]

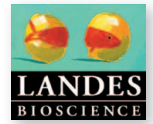

## **Supplemental Material to:**

**Frédéric Gros, Johan Arnold, Nicolas Page,  
Marion Décossas, Anne-Sophie Korganow, Thierry Martin  
and Sylviane Muller**

**Macroautophagy is deregulated in murine  
and human lupus T lymphocytes**

**Autophagy 2012; 8(7)**

**<http://dx.doi.org/10.4161/auto.20275>**

**[www.landesbioscience.com/journals/autophagy/article/20275](http://www.landesbioscience.com/journals/autophagy/article/20275)**

**Figure S1**

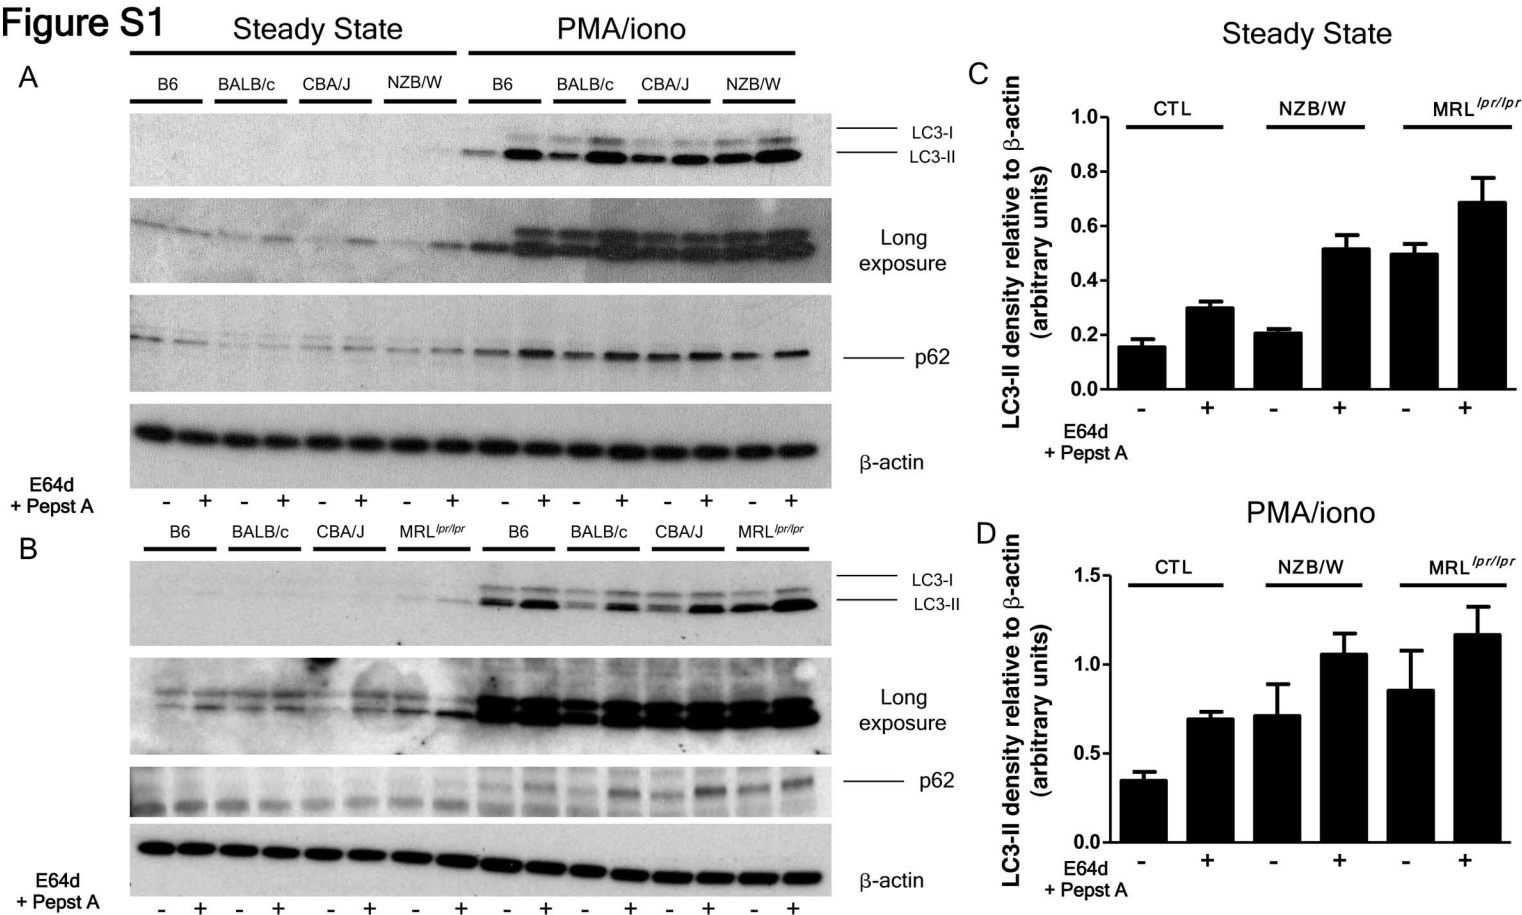

**Figure S1.** Autophagic activity is higher in lupus-prone mice compared to several control mouse strains. T cells were sorted from spleens of control CBA/J, C57BL/6 (B6), BALB/c and lupus-prone MRL *lpr/lpr* and NZB/W mice sacrificed at 12 weeks in (A) and 17 weeks in (B). Cells were left unstimulated at 37°C for 18 h (steady state) or stimulated for the same time with 50 ng/mL PMA and 1  $\mu$ M ionomycin (PMA/iono). When indicated, cells were treated (+) or not (-) with 5  $\mu$ g/mL pepstatin A and 5  $\mu$ g/mL E64d to block lysosomal degradation. Cell lysates were resolved by SDS-PAGE, transferred onto PVDF membranes before staining with anti-LC3 and anti-p62 Abs. Loading controls were performed by staining actin b-chain. (C and D) Same experiment: means obtained from four independent experiments. CTL = merged data of C57BL/6, BALB/c and CBA/J (n = 4), NZB/W (n = 2) and MRL *lpr/lpr* (n = 2) lupus mice at steady state (C) and under PMA/Ionomycin stimulations (D).

Figure S2

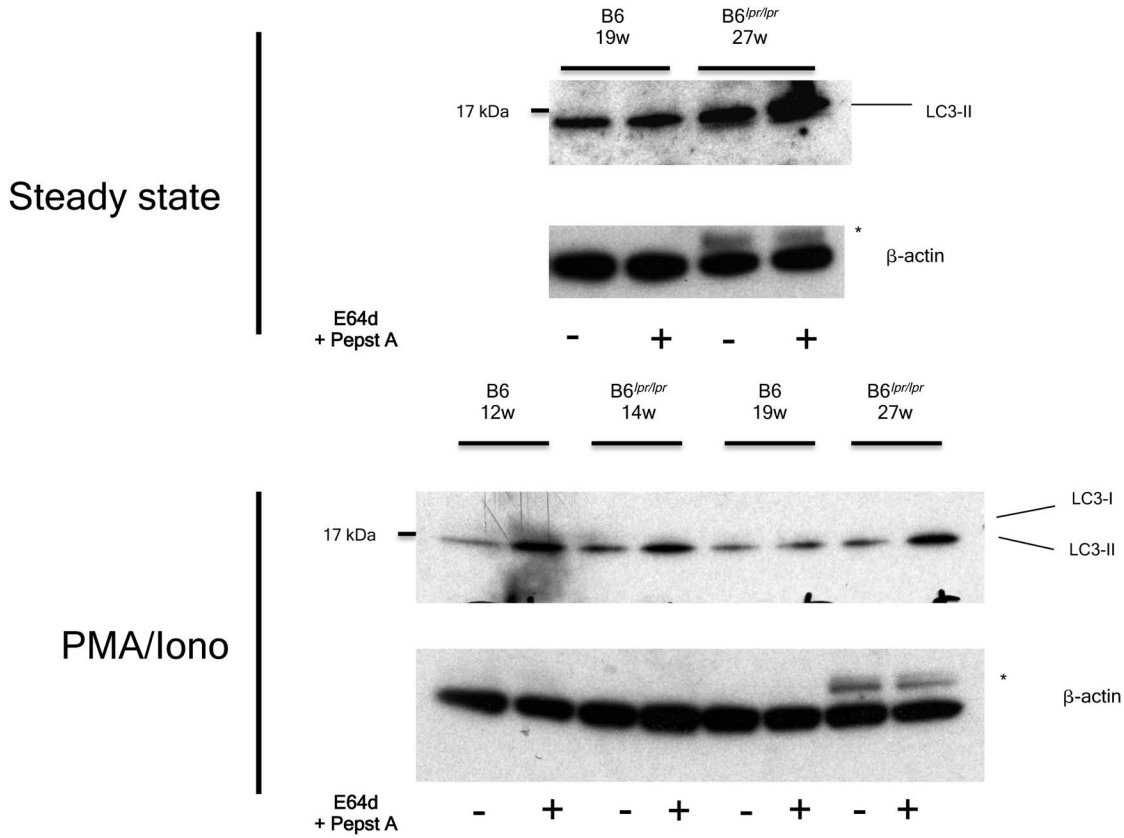

Figure S2. No difference in autophagic activity in T cells from lupus B6<sup>lpr/lpr</sup> mice compared to control B6 mice. T cells were sorted from spleens of C57BL/6 (B6) and C57BL/6<sup>lpr/lpr</sup> (B6<sup>lpr/lpr</sup>) mice sacrificed at the indicated ages and left unstimulated at 37°C for 18 h (steady state) or stimulated for the same time with 50 ng/mL PMA and 1 μM ionomycin (PMA/Iono). When indicated, cells were treated (+) or not (-) with 5 μg/mL pepstatin A and 5 μg/mL E64d to block lysosomal degradation. Cell lysates were resolved by SDS-PAGE, transferred onto PVDF membranes before staining with anti-LC3 Ab. Loading controls were performed by staining actin b-chain. \*Band corresponding to heavy and light chain of immunoglobulins retained in lysates obtained from oldest lupus mice.

## Figure S3

Splenic B cells

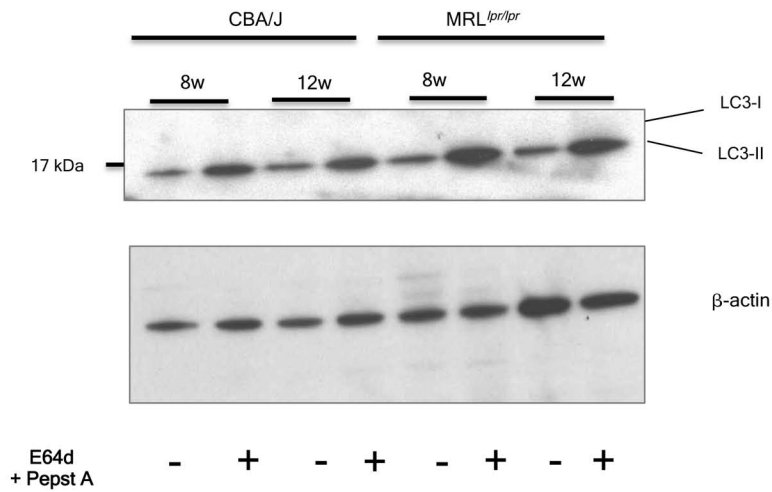

**Figure S3.** Autophagic activity is similar in splenic B cells from MRL<sup>lpr/lpr</sup> and CBA/J mice. B cells were sorted from spleens of control CBA/J and lupus-prone MRL<sup>lpr/lpr</sup> mice sacrificed at the indicated ages (8 and 12 weeks). Cells were left unstimulated at 37°C for 4 h. As indicated, cells were treated (+) or not (-) with 5 µg/mL pepstatin A and 5 µg/mL E64d to block lysosomal degradation. Cell lysates were resolved by SDS-PAGE, transferred onto PVDF membranes before staining with anti-LC3 Ab. Loading controls were performed by staining actin b-chain.

Figure S4

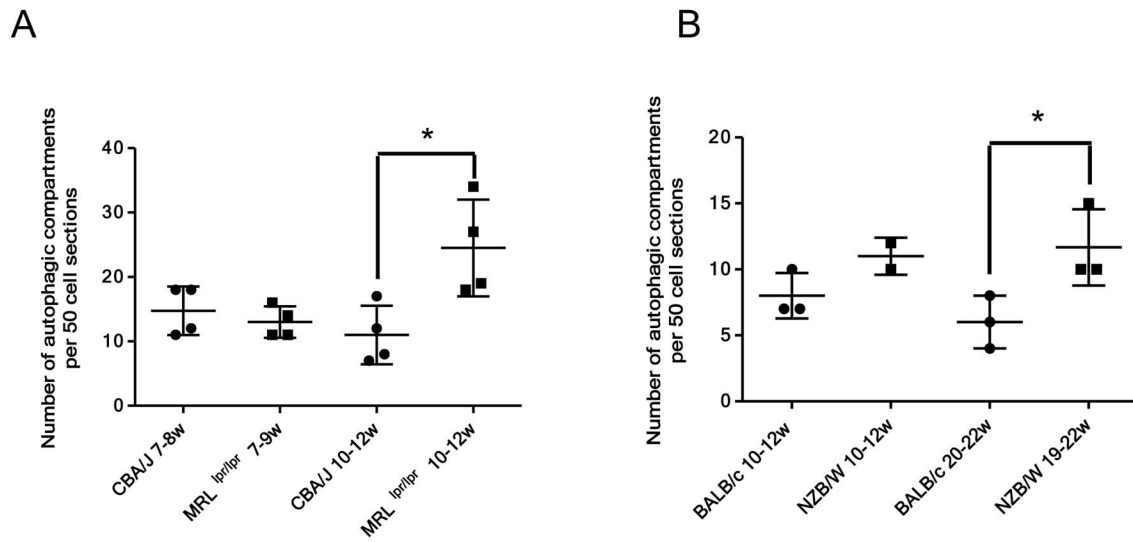

Figure S4. Autophagic activity is maintained or increased in lupus mice compared to control mice. Quantification by TEM of autophagosomes counted in 50 peripheral T lymphocyte sections sorted from spleens of control CBA/J and lupus MRL *lpr/lpr* mice (A) or from control BALB/c and lupus NZB/W (B). Mice were sacrificed at the indicated ages. Each point represents measurement of an individual mouse. Central bars refer to the mean and vertical bars stand for standard deviation. \* $p < 0.05$  using unpaired t test. w = week.

Figure S5

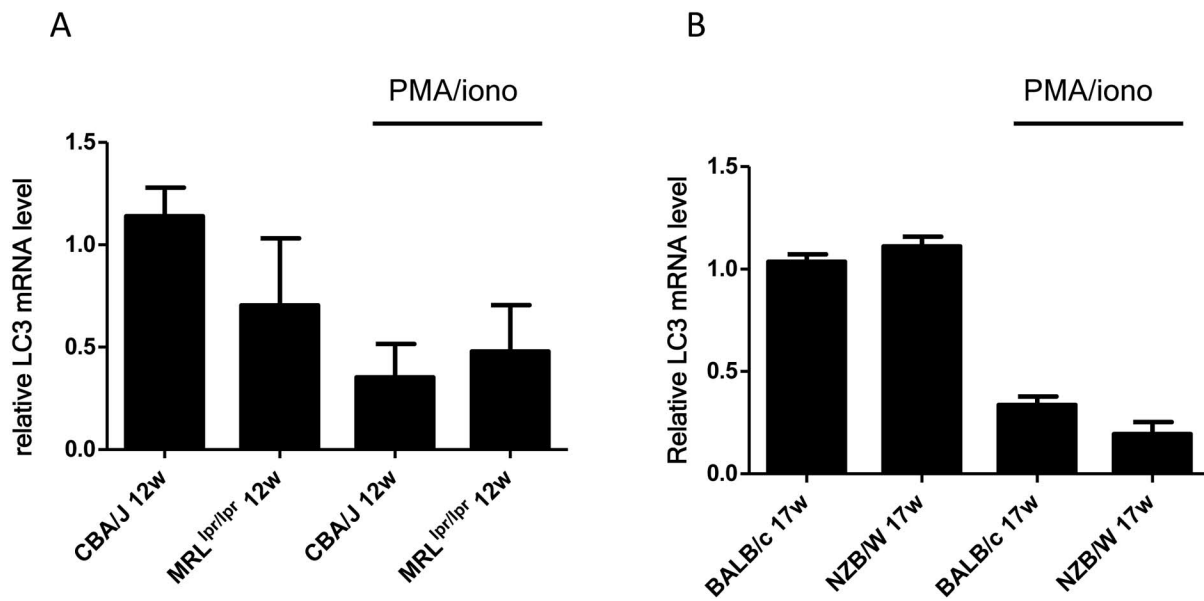

**Figure S4.** Higher LC3-II levels observed in lupus-prone mice are not a consequence of LC3 mRNA level increase. T cells were sorted from spleens of control CBA/J, BALB/c and lupus-prone MRL<sub>lpr/lpr</sub> and NZB/W mice sacrificed at 12 weeks (A) and 17 weeks (B). Cells were left unstimulated at 37°C for 18 h (steady state) or stimulated for the same time with 50 ng/mL PMA and 1 μM ionomycin (PMA/iono). RNA was isolated and retrotranscribed into cDNA. Quantitative RT-PCR was then performed for measurement of *Map1lc3a* transcripts and were normalized to *Actb* as described in material and methods section. mRNA levels are relative to one control mouse per PCR plate arbitrarily set to 1.
